# Supplementary material for: Observing fermionic statistics with photons in arbitrary processes
Source: PubMed Central journal article supplement — Sci Rep. 2013 Mar 27;3:1539. doi: 10.1038/srep01539 (PMC3609020; doi:10.1038/srep01539), 2013-03-27
Supplement: srep01539-s1.pdf [file srep01539-s1.pdf]

# Supplementary information for: Observing fermionic statistics with photons in arbitrary processes

Jonathan C. F. Matthews,<sup>1</sup> Konstantinos Poullos,<sup>1</sup> Jasmin D. A. Meinecke,<sup>1</sup> Alberto Politi,<sup>1</sup>  
Alberto Peruzzo,<sup>1</sup> Nur Ismail,<sup>2</sup> Kerstin Wörhoff,<sup>2</sup> Mark G. Thompson,<sup>1</sup> and Jeremy L. O'Brien<sup>1,\*</sup>

<sup>1</sup>*Centre for Quantum Photonics, H. H. Wills Physics Laboratory & Department of Electrical and Electronic Engineering,  
University of Bristol, Merchant Venturers Building, Woodland Road, Bristol, BS8 1UB, UK*

<sup>2</sup>*Integrated Optical Microsystems Group, MESA+ Institute for Nanotechnology, University of Twente, Enschede, The Netherlands*

(Dated: February 21, 2013)

**Operator for continuous, constant nearest neighbour coupling.** Evanescently coupled uniform waveguide arrays are modelled with the coupled oscillator Hamiltonian

$$H = \sum_j \beta a_j^\dagger a_j + C a_{j-1}^\dagger a_j + C a_{j+1}^\dagger a_j \quad (1)$$

for waveguide propagation constant (site potential)  $\beta$  and constant coupling coefficient  $C$ , where  $\beta, C \in \mathbb{R}$ . In the basis of single position (or mode) states  $\{|1\rangle_1, |1\rangle_2, \dots, |1\rangle_n\}$ , the Hamiltonian is represented by a tri-diagonal  $M \times M$  matrix

$$H_{i,j} = \begin{cases} \beta, & i = j \\ C, & i = j \pm 1 \end{cases} \quad (2)$$

Unitary evolution of this Hamiltonian after time  $T = cz$  is given by  $U = e^{iHT}$ , where  $z$  is propagation distance in the waveguide and  $c$  is the effective propagation speed which is equivalent to a continuous time quantum walk on a one dimensional graph<sup>1</sup>.

The device reported is a uniform array of  $M = 21$  waveguides. The propagation length  $z$  is such that the linear ballistic propagation resulting from launching light into the central waveguides<sup>1</sup> does not extend beyond ten central waveguides which are accessed in the experiment. For computing similarity between experiment and theory the matrix  $A$  is modelled by extracting the central  $10 \times 10$  submatrix of a  $21 \times 21$  unitary matrix  $U = e^{iHT}$ , computed using Eq. 1 with parameters  $T = 13.9$ ,  $\beta = 0$  and  $C = 0.15$ ; the theoretical model assumes the array to be uniform and to have zero loss. Both assumptions can give rise to  $S < 100\%$  in our analysis.

**2-particle correlation functions.** Quantum interference between two indistinguishable particles—modelled by creation operators  $a_j^\dagger$  and annihilation operators  $a_j$  acting on labeled modes  $j$  in a finite set of modes associated to system  $a$ —is quantified by the correlation function  $\Gamma_{r,q}^\phi$  and has been derived for photons (bosons)<sup>2</sup> and fermions<sup>3</sup> in multi-port networks. Here we review derivation and adapt for fractional statistics that allow continuous deformation between Bose-Einstein and Fermi-Dirac statistics.

Consider two indistinguishable particles that are governed by the relations

$$a_j^\dagger a_k^\dagger - e^{i\phi} a_k^\dagger a_j^\dagger = 0 \quad (3)$$

$$a_j a_k - e^{i\phi} a_k a_j = 0 \quad (4)$$

$$a_j a_k^\dagger - e^{i\phi} a_k^\dagger a_j = \delta_{j,k} \quad (5)$$

for Bose-Einstein ( $\phi = 0$ ) and Fermi-Dirac ( $\phi = \pi$ ) statistics, governing exchange according to the permutation group<sup>4</sup>. We can also define particles that undergo a fractional phase change  $0 < \phi < \pi$  with  $j < k$ , on exchanging two such particles according to braiding operations defined as 'clockwise'. For  $j > k$ , anti-clockwise braids are defined with  $-\pi < \phi < 0$ .

A mode transformation  $A$  on a state of two indistinguishable particles created in modes  $j$  and  $k$ , maps the initial state  $a_j^\dagger a_k^\dagger |0\rangle$  to a linear superposition of two particle states according to

$$a_j^\dagger a_k^\dagger |0\rangle \xrightarrow{A} \sum_{s,t} A_{s,j} A_{t,k} a_s^\dagger a_t^\dagger |0\rangle, \quad (6)$$

where  $A$  is expressed as a matrix in the mode basis. Correlated detection at  $r$  and  $q$  will occur as a result of two possible events: (i.) the particle at  $j$  is mapped to position  $r$  and the particle at  $k$  is mapped to  $q$  with amplitude

$A_{r,j}A_{q,k}$ ; (ii.) the particle at  $j$  is mapped to position  $q$  and the particle at  $k$  is mapped to  $r$  with amplitude  $A_{q,j}A_{r,k}$ . Labelling modes such that  $j < k$  and  $r < q$  implies (ii.) is equivalent to at least one exchange of the position of the two particles. Here we define (i.) corresponds to no exchange while (ii.) corresponds to a single swap or braid operation according to (3-5).

Since the two particles are indistinguishable, quantum mechanics dictates outcomes (i.) and (ii.) are indistinguishable and hence the complex probability amplitudes  $A_{r,j}A_{q,k}$  and  $A_{q,j}A_{r,k}$  interfere in the correlation across  $r$  and  $q$ . The correlated detection outcome  $\Gamma_{r,q}^\phi$  is therefore computed by projecting the state  $\langle 0|a_r a_q$  on the output state (6), using the inner product

$$\langle 0|a_r a_q a_j^\dagger a_k^\dagger |0\rangle = \delta_{q,j}\delta_{r,k} + e^{i\phi}\delta_{r,j}\delta_{q,k}, \quad (7)$$

which follows from the relations (3-5). Combining expressions (6) and (7) therefore yields

$$\Gamma_{r,q}^\phi = |A_{r,j}A_{q,k} + e^{i\phi}A_{q,j}A_{r,k}|^2 \quad (8)$$

for exchange statistics parameterised by  $\phi$ . Note that for fermions ( $\phi = \pi$ ) the diagonal elements of the matrix  $\Gamma_{r,r}^\pi = 0$  agree with the Pauli-exclusion principle.

**$N$ -particle correlation functions.** Consider  $N$  particles with exchange parameter  $\phi$  and governed by the relations (3-5) which are launched into inputs labelled by tuple  $\vec{\nu} = \{\nu_1, \nu_2, \dots, \nu_N\}$  of mode transformation  $A$ . The  $N$ -fold correlation function for detection across output  $N$ -tuple  $\vec{\mu} = \{\mu_1, \mu_2, \dots, \mu_N\}$  is derived for multi-particle quantum walks with both Fermi-Dirac and Bose-Einstein statistics<sup>5</sup>.

The input state is mapped by arbitrary  $A$  to a linear superposition of  $N$ -particle states at the output of  $A$  according to

$$\prod_{j=1}^N a_{\nu_j}^\dagger |0\rangle \xrightarrow{A} \prod_{j=1}^N \left( \sum_{p=1}^N A_{p,\nu_j} a_p^\dagger \right) |0\rangle. \quad (9)$$

Defining  $\nu_1 < \nu_2 < \dots < \nu_N$  and  $\mu_1 < \mu_2 < \dots < \mu_N$  we can consider the transformation  $A$  maps the  $N$  particles at  $\vec{\nu}$  to the output  $\vec{\mu}$  in  $N!$  indistinguishable possibilities. One of these possibilities maps  $\nu_j$  to  $\mu_j$  for all  $j$  which we define to not exchange a single pair of particles. The remaining  $N! - 1$  map  $\nu_j$  to  $\sigma_{\mu_j}$  for all  $j$  for some permutation  $\sigma_\mu$  of  $\mu$  and are defined to exchange particles with the minimum number of pairwise transpositions in clockwise braids that transform  $\nu$  to  $\sigma_\mu$ . Each braid between any two particles makes the combined wave-function acquire a phase  $\phi$ ;  $m$  clockwise braids that are the minimum number required to map  $\nu$  to  $\sigma_\nu$  therefore cause the global wave-function to acquire phase  $m\phi$ . From this definition, we obtain an  $N$ -particle generalisation of expression (7):

$$\left( \langle 0| \prod_{s=1}^N a_{\mu_s} \right) \left( \prod_{j=1}^N a_{\nu_j}^\dagger |0\rangle \right) = \sum_{\sigma_\nu \in S_n} e^{i\tau(\sigma_\nu)\phi} \prod_{j=1}^N \delta_{\mu_j, \sigma_{\mu_j}}, \quad (10)$$

where  $\tau(\sigma_\nu)$  is the minimum number of pairwise transpositions (neighbouring swaps) relating  $\sigma_\nu$  to  $\vec{\nu}$ . Projection onto the output state (9) with  $N$ -particles at  $\vec{\mu}$  uses relations (3-5) and (10) for a fractional parameter ( $0 < \phi < \pi$ ) to yield

$$\Gamma_{\vec{\mu}}^\phi = \left| \sum_{\sigma_\nu \in S_n} e^{i\tau(\sigma_\nu)\phi} \prod_{j=1}^n A_{\mu_j, \sigma_{\nu_j}} \right|^2. \quad (11)$$

Varying  $\phi$  allows continuous deformation between Bose-Einstein ( $\phi = 0$ ) and Fermi-Dirac ( $\phi = \pi$ ) quantum interference.

**Generating  $N$ -partite,  $N$ -level entanglement.** A quantum algorithm for anti-symmetrising arbitrary products of  $n$  wave functions  $|\rho_1, \rho_2, \dots, \rho_n\rangle_A$  is presented<sup>6</sup> that would use three registers of  $n$ ,  $m$ -digit quantum words or ‘‘qu-words’’ (strings of  $n \log_2 m$  qubits). This was then simplified<sup>7</sup> to use two registers of qubits  $A$  and  $B$ ; the first encodes the wavefunctions  $|\rho_1, \rho_2, \dots, \rho_n\rangle$ . The second register is mapped to a symmetrized state with  $O(n(\ln m)^2)$

local operations followed by  $O(n^2 \ln m)$  controlled operations leaving the second register in the state

$$\frac{1}{\sqrt{N!}} \sum_{\sigma \in S_N} |\sigma(1, \dots, N)\rangle_B \quad (12)$$

where  $\sigma(1, \dots, N)$  is a permutation  $\sigma \in S_N$  of the  $N$ -tuple  $\{1, 2, \dots, N\}$ . The state Eq. 12 is then antisymmetrised by a sorting algorithm using  $O(n \ln n)$  operations, applying the same swaps (via controlled operations) and phase shifts to the first register to antisymmetrize  $|\rho_1, \rho_2, \dots, \rho_n\rangle_A$ . For our purpose, we require only the one register  $B$ , since the state we wish to generate is known and of the form

$$\begin{aligned} |\psi_N(\phi)\rangle &= \frac{1}{\sqrt{N!}} \sum_{\sigma_\nu \in S_N} e^{i\tau(\sigma_\nu)\phi} \prod_{j=1}^N a_{\sigma_\nu j}^{(j)\dagger} |0\rangle \\ &= \frac{1}{\sqrt{N!}} \sum_{\sigma_\nu \in S_N} e^{i\tau(\sigma_\nu)\phi} |\sigma_\nu(1, 2, \dots, N)\rangle \end{aligned} \quad (13)$$

where  $\sigma(1, \dots, N)$  can be decomposed into  $\tau(\sigma)$  adjacent transpositions.

The approach shown in Fig. 1 represents each  $i^{\text{th}}$  qu-word (denoted  $B[i]$ ) in the register as an  $N$ -level qudit, for the examples  $N = 2, 3$ , and generates the state  $|\psi_N(\phi)\rangle$  in an iterative process, using  $\sum_{i=1}^{N-1} i \sum_{j=1}^i j < N^3$  controlled operations. Here each controlled operation is counted as one swap operation of two modes in a given qudit, conditional on an excitation in one of the  $N$  levels of the control qudit. Realisation with linear optics for example, could use a heralded KLM CNOT gate<sup>8,9</sup>, each requiring two extra (ancilla) photons, and an interferometric structure of seven beamsplitters.

As with Refs. 6,7, the  $N$  qudits are initialised in superposition using local operations (mode splitters;  $MS$ )

$$\begin{aligned} &|1\rangle_{B[N]} \otimes \dots \otimes |1\rangle_{B[1]} \\ &\xrightarrow{MS} \frac{1}{\sqrt{N!}} \left( \sum_{k=1}^N |k\rangle_{B[N]} \right) \otimes \left( \sum_{k=1}^{N-1} |k\rangle_{B[N-1]} \right) \otimes \dots \otimes |1\rangle_{B[1]} \end{aligned} \quad (14)$$

Note that this step puts the state in the correct number of  $N!$  terms required for the eventual entangled state. Using linear optics, this would use one photon for each qudit and  $\sum_{j=1}^N (j-1) = O(N^2)$  two-mode beam splitters (with appropriate reflectivities).

The next step in generating  $|\psi_N(\phi)\rangle$  is to introduce the phase relationship  $\phi$  according to

$$\begin{aligned} &\frac{1}{\sqrt{N!}} \left( \sum_{k=1}^N e^{i(k-1)\phi} |k\rangle_{B[N]} \right) \otimes \left( \sum_{k=1}^{N-1} e^{i(k-1)\phi} |k\rangle_{B[N-1]} \right) \otimes \dots \\ &\dots \otimes |1\rangle_{B[1]} \end{aligned} \quad (15)$$

which uses  $\sum_{j=1}^N (j-1) = O(N^2)$  local phase shift operations. A set of  $\sum_{i=1}^{N-1} i \sum_{j=1}^i j = O(N^4)$  controlled operations are then applied iteratively to generate  $|\psi_N(\phi)\rangle$ ; this process can be thought of as performing a series of controlled operations on the intermediate states

$$\frac{1}{\sqrt{q+1}} \sum_{j=1}^{q+1} e^{i(j-1)\phi} |j\rangle_{B[q+1]} \otimes |\psi_q(\phi)\rangle_{B[q, \dots, 1]} \quad (16)$$

for each step of the iteration  $q = 2, \dots, N-1$ . This is verified for  $q = 2$  (see Fig. 1(a) and Fig. 1(b)). Next we assume inductively the process works for some  $q = r$  to generate  $|\psi_q(\phi)\rangle$ . For  $q = r+1$ , the process would begin with the

state

$$\begin{aligned} & \frac{1}{\sqrt{r+1}} \sum_{j=1}^{r+1} e^{i(j-1)\phi} |j\rangle_{B[r+1]} \otimes |\psi_r(\phi)\rangle_{B[r,\dots,1]} \\ &= \frac{1}{\sqrt{r+1}} \sum_{j=1}^{r+1} e^{i(j-1)\phi} |j\rangle_{B[r+1]} \otimes \frac{1}{\sqrt{r!}} \sum_{\sigma \in S_r} |\sigma(1,\dots,r)\rangle_{B[r,\dots,1]} \end{aligned} \quad (17)$$

A series of controlled qudit shift operations are then applied, such that an excitation of mode  $j$  of the  $B[r+1]$  qudit shifts each of the labeled modes  $\{j, \dots, r\}$  to  $\{j+1, \dots, r+1\}$  in the target qudits labelled  $\{B[r], \dots, B[1]\}$ , such that the overall state evolves to

$$\begin{aligned} & \frac{1}{\sqrt{(r+1)!}} \sum_{\sigma \in S_r} e^{i\tau_\nu(\sigma)\phi} \left\{ |1\rangle_{B[r+1]} |\sigma(2, \dots, r+1)\rangle_{B[r,\dots,1]} + e^{i\phi} |2\rangle_{B[r+1]} |\sigma(1, 3, 4, \dots, r+1)\rangle_{B[r,\dots,1]} \right. \\ & \quad \dots + e^{i(j-1)\phi} |j\rangle_{B[r+1]} |\sigma(1, 2, 3, \dots, j-1, j+1, \dots, r+1)\rangle_{B[r,\dots,1]} + \dots \\ & \quad \left. \dots + e^{ir\phi} |r+1\rangle_{B[r+1]} |\sigma(1, 2, \dots, r)\rangle_{B[r,\dots,1]} \right\} \end{aligned} \quad (18)$$

The tuple  $\{j, 1, 2, \dots, j-1, j+1, \dots, r+1\}$  is  $(j-1)$  adjacent transpositions from the tuple  $\{1, 2, \dots, r+1\}$ . Since the permutation  $\sigma(1, 2, \dots, j-1, j+1, \dots, r+1)$  is  $\chi(\sigma)$  adjacent transpositions away from the ordered set  $\{1, 2, \dots, j-1, j+1, \dots, r+1\}$ , it follows that the tuple  $\{j, \sigma(1, 2, \dots, j-1, j+1, \dots, r+1)\}$  is  $(j-1 + \chi(\sigma))$  adjacent transpositions different from  $\{1, 2, \dots, r+1\}$ . Hence the Eq. 18 is equivalent to the state

$$|\psi_{r+1}(\phi)\rangle = \frac{1}{\sqrt{(r+1)!}} \sum_{\gamma \in S_r} e^{i\tau_\nu(\gamma)\phi} |\gamma(1, \dots, r+1)\rangle_{B[r+1,\dots,1]} \quad (19)$$

as required. Therefore, by induction we have an iterative process that generates  $|\psi_N(\phi)\rangle$  for arbitrary size  $q = N$ , requiring  $O(N^2)$  local operations, and  $O(N^4)$  controlled swap operations.

---

\* Electronic address: [jeremy.obrien@bristol.ac.uk](mailto:jeremy.obrien@bristol.ac.uk)

<sup>1</sup> Perets, H. B. *et. al.* Realization of quantum walks with negligible decoherence in waveguide lattices. *Phys. Rev. Lett.* **100**, 170506 (2008).

<sup>2</sup> Mattle, K., Michler, M., Weinfurter, H., Zeilinger, A. & Zukowski, M. Non-classical statistics at multiport beam splitters. *Appl. Phys. B* **60**, S111-S117 (1995).

<sup>3</sup> Lim, Y. L. & Beige, A. Generalized hong-ou-mandel experiments with bosons and fermions. *New J. Phys.* **7**, 155 (2005).

<sup>4</sup> Feynman, R. P. *Statistical Mechanics: A Set of Lectures*, W. A. Benjamin, inc. (1972).

<sup>5</sup> Mayer, K., Tichy, M. C., Mintert, F., Konrad, T. & Buchleitner, A. Counting statistics of many-particle quantum walks. *arXiv:1009.5241v1 [quant-ph]* (2010).

<sup>6</sup> Abrams, D. S. & Lloyd, S. *Phys. Rev. Lett.* **79**, 2586–2589 (1997).

<sup>7</sup> Ward, N J., Kassal, I. & Aspuru-Guzik, A. *J. Chem. Phys.* **130**, 194105 (2009).

<sup>8</sup> Ralph, T. C., White, A. G., Munro, W. J. & Milburn, G. J. *Phys. Rev. A* **65**, 012314 (2001).

<sup>9</sup> Okamoto, R., O'Brien, J. L., Hofmann, H. F. & Takeuchi, S. *Proceedings of the National Academy of Science*, **108**, 10067–10071 (2011).

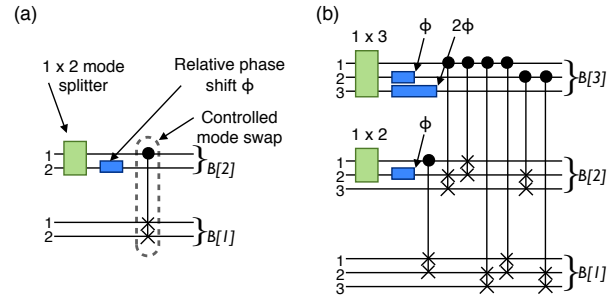

FIG. 1: Qudit circuits for generating  $|\psi_N(\phi)\rangle$  for (a)  $N = 2$  and (b)  $N = 3$ . Qudits are initialised in the state  $|1\rangle_{B[N]} \otimes \dots \otimes |1\rangle_{B[1]}$ , where  $B[i]$  denotes the  $i^{\text{th}}$  qudit in the register. The green squares represent  $1 \times k$  mode splitters that can be decomposed into  $k - 1$  two-mode splitters. Blue rectangles represent a relative phase shift with labelled phase  $j\phi$ . Each controlled swap between two modes denoted 'x' are conditional on an excitation in the corresponding mode denoted by a '•'.
